# Supplementary material for: Crystal engineering with pyrazolyl-thiazole derivatives: structure-directing role of π-stacking and σ-hole interactions
Source: Royal Society of Chemistry journal article supplement (doi:10.1039/d1ce00256b), 2021-01-01

## Electronic Supplementary File

for manuscript:

### Crystal engineering with pyrazolyl-thiazole derivatives: Structure-directing role of $\pi$ -stacking and $\sigma$ -hole interactions

Muhammad Naeem Ahmed<sup>a,\*</sup>, Murtaza Madni<sup>b,\*</sup>, Shaista Anjum<sup>a</sup>, Saiqa Andleeb<sup>c</sup>, Shahid Hameed<sup>b</sup>, Abdul Majeed Khan<sup>d</sup>, Muhammad Ashfaq<sup>e</sup>, Muhammad Nawaz Tahir<sup>e</sup>, Diego M. Gil<sup>f</sup> and Antonio Frontera<sup>g,\*</sup>

**Figure S1**, Hirshfeld surfaces of compounds **7**, **8** and **10** mapped over Shape Index and Curvedness properties.

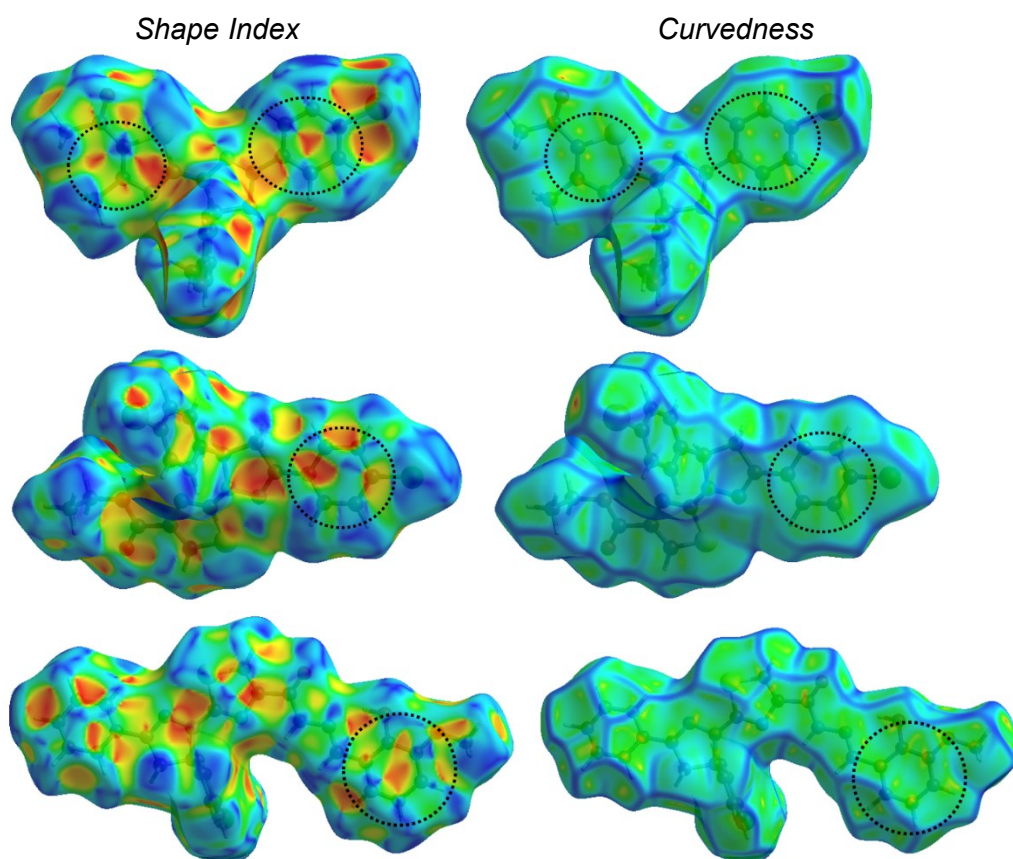

Supplement: d1ce00256b1.pdf [file d1ce00256b1.pdf]
